# Supplementary material for: Serum Metabolomic Analysis of Radiation-Induced Lung Injury in Rats
Source: PubMed Central journal article supplement — Dose Response. 2022 Jan 5;20(1):15593258211067060. doi: 10.1177/15593258211067060 (PMC8753076; doi:10.1177/15593258211067060), 2022-01-05
Supplement: sj-pdf-1-dos-10.1177_15593258211067060.pdf [file sj-pdf-1-dos-10.1177_15593258211067060.pdf]

**Table 1. 19 common differential metabolites in 10 Gy Vs 0 Gy group and 20 Gy Vs 0 Gy group.**

| NO. | Metabolites           | 10 Gy Vs 0 Gy |                 |             | 20 Gy Vs 0 Gy |                 |                             | Regulation      |
|-----|-----------------------|---------------|-----------------|-------------|---------------|-----------------|-----------------------------|-----------------|
|     |                       | VIP           | <i>P</i> -value | Fold-Change | VIP           | <i>P</i> -value | Fold-Change                 |                 |
| 1   | Benzyl thiocyanate    | 1.77          | 6.07E-03        | 0.38        | 2.92          | 6.00E-10        | Undetectable in 20 Gy group | Down-regulation |
| 2   | Carbazole             | 2.06          | 1.43E-02        | 0.42        | 2.82          | 2.19E-10        | Undetectable in 20 Gy group | Down-regulation |
| 3   | N-formyl-L-methionine | 1.93          | 2.20E-02        | 0.45        | 2.65          | 1.63E-10        | Undetectable in 20 Gy group | Down-regulation |
| 4   | hydrocinnamic acid    | 1.18          | 2.94E-02        | 3.64        | 1.55          | 3.33E-02        | 3.28                        | Up-regulation   |
| 5   | taurine               | 1.94          | 2.84E-04        | 8.19        | 2.50          | 9.83E-04        | 5.82                        | Up-regulation   |
| 6   | Cumic Acid            | 1.16          | 1.90E-05        | 9.83        | 1.38          | 4.51E-03        | 6.77                        | Up-regulation   |

---

|    |                               |      |          |           |      |          |           |               |
|----|-------------------------------|------|----------|-----------|------|----------|-----------|---------------|
| 7  | oxalic acid                   | 2.34 | 5.01E-06 | 15.79     | 3.12 | 6.94E-06 | 15.05     | Up-regulation |
| 8  | 3-Methylamino-1,2-propanediol | 1.37 | 2.76E-07 | 33.33     | 1.56 | 7.91E-03 | 21.90     | Up-regulation |
| 9  | isocitric acid                | 1.52 | 4.97E-07 | 69.08     | 1.72 | 1.18E-02 | 44.99     | Up-regulation |
| 10 | 2-aminoethanethiol            | 1.92 | 2.57E-08 | 73.07     | 2.41 | 9.45E-03 | 46.30     | Up-regulation |
| 11 | norvaline                     | 2.34 | 2.01E-07 | 76.66     | 3.01 | 9.84E-03 | 48.58     | Up-regulation |
| 12 | Maleamate                     | 2.41 | 5.74E-07 | 125.60    | 3.11 | 3.08E-03 | 74.34     | Up-regulation |
| 13 | N-Ethylglycine                | 2.54 | 8.43E-07 | 146.58    | 3.28 | 8.57E-03 | 94.36     | Up-regulation |
| 14 | dibenzofuran                  | 2.54 | 9.75E-08 | 158.66    | 3.28 | 1.07E-02 | 101.39    | Up-regulation |
| 15 | 5,6-Dimethylbenzimidazole     | 1.82 | 5.67E-03 | 448.45    | 2.41 | 3.49E-03 | 370.81    | Up-regulation |
| 16 | S-carboxymethylcysteine       | 2.63 | 1.41E-07 | 392206.56 | 2.88 | 1.66E-02 | 230799.48 | Up-regulation |

---

---

|    |                       |      |          |             |      |          |             |               |
|----|-----------------------|------|----------|-------------|------|----------|-------------|---------------|
| 17 | Methylmalonic acid    | 2.75 | 2.77E-05 | 1500951.75  | 2.37 | 4.97E-02 | 556526.10   | Up-regulation |
| 18 | methyl heptadecanoate | 2.42 | 6.55E-04 | 5073179.44  | 2.09 | 4.97E-02 | 3247908.58  | Up-regulation |
| 19 | p-benzoquinone        | 3.10 | 1.22E-07 | 61267426.00 | 3.43 | 1.20E-02 | 37867863.12 | Up-regulation |

---

**Table 2.** KEGG pathways of dysregulated metabolites.

| <b>Group</b>  | <b>Pathway</b>                          | <b>P-value</b> | <b>Metabolites</b>                                     |
|---------------|-----------------------------------------|----------------|--------------------------------------------------------|
| 10 Gy Vs 0 Gy | Taurine and hypotaurine metabolism      | 3.02E-03       | 5,6-Dimethylbenzimidazole, 2-Aminoethanethiol          |
|               | Riboflavin metabolism                   | 3.32E-03       | Benzyl thiocyanate, P-benzoquinone                     |
|               | Glyoxylate and dicarboxylate metabolism | 1.42E-02       | Oxalic acid, Dibenzofuran                              |
| 20 Gy Vs 0 Gy | Taurine and hypotaurine metabolism      | 4.58E-03       | pyrogallol, methyl heptadecanoate                      |
|               | Riboflavin metabolism                   | 5.05E-03       | Norvaline, 5,6-Dimethylbenzimidazole                   |
|               | ABC transporters                        | 1.04E-02       | Oxalic acid, Methyl heptadecanoate, 3-Hydroxynorvaline |
|               | beta-Alanine metabolism                 | 1.09E-02       | Malonic acid, 3-Hydroxynorvaline                       |
|               | Glyoxylate and dicarboxylate metabolism | 2.12E-02       | 3-Methylamino-1,2-propanediol, Cumic Acid              |

---

Steroid biosynthesis

2.80E-02

Isocitric acid, Ribulose-5-phosphate

Pyrimidine metabolism

3.67E-02

Malonic acid, Methylmalonic acid

---
